# Supplementary material for: Low Infection of Phelipanche aegyptiaca in Micro-Tom Mutants Deficient in CAROTENOID CLEAVAGE DIOXYGENASE 8
Source: MDPI journal article supplement (doi:10.3390/ijms19092645), 2018-09-06
Supplement: s1 [file s1]

**Supplementary Table S1** *SICCD8* mutant lines provided by the University of Tsukuba

| Line No. | Point mutation (nucleotide) | Point mutation (amino acid) | Recessive homozygous mutants | Number of branches | Orobanchol   | Germination assay |
|----------|-----------------------------|-----------------------------|------------------------------|--------------------|--------------|-------------------|
| WT       | —                           | —                           | —                            | 1–4                | Detected     | Germinated        |
| 7343     | G1498T                      | V206F                       | Not found                    | —                  | —            | —                 |
| 7024     | A1507T                      | T209S                       | Not found                    | —                  | —            | —                 |
| 8245     | G1624A                      | D248N                       | Found                        | 1–4                | Detected     | Germinated        |
| 7311     | G1624A                      | D248N                       | Not found                    | —                  | —            | —                 |
| 5639     | C1769T                      | P296L                       | Not found                    | —                  | —            | —                 |
| 7720     | C2122T                      | D387 =<br>Stop codon        | Not found                    | —                  | —            | —                 |
| 8940     | G2214T                      | Non-coding                  | Found                        | 1–4                | Detected     | Germinated        |
| 2481     | G2266A                      | Splice junction             | Not found                    | —                  | —            | —                 |
| 5550     | G2271A                      | G414R                       | Not found                    | —                  | —            | —                 |
| 3979     | C2302T                      | P424L                       | Not found                    | —                  | —            | —                 |
| 5291     | C2578T                      | S494F                       | Found                        | 4–7                | Not detected | Not germinated    |
| 2757     | G2616A                      | E507K                       | Found                        | 4–7                | Not detected | Not germinated    |

**Supplementary Table S2** Primers used in this study

| Primer name*                          | 5'-sequence-3'                        |
|---------------------------------------|---------------------------------------|
| <i>SICCD8</i> -TILLING F              | AACCTCATTCCACATCATGTCAC               |
| <i>SICCD8</i> -TILLING R              | TTGGAACCCAACAACCATGTAG                |
| 5291 F                                | AAGGCATGGATATGTGCAGT                  |
| 5291 R                                | TTGTTGAGAACAGGGCCAAA                  |
| 2757 F                                | AAGGTCAGCTTCTTTTCCTTAC                |
| 2757 R                                | TGTTACACCTTGTTTCAGAACAG               |
| <i>SICCD8</i> -qRT-PCR F              | AGATATGCTTATGCTTGTGGTGCTA             |
| <i>SICCD8</i> -qRT-PCR R              | ACAGCACCTTCATCATAACCAATTCT            |
| <i>SICCD8</i> -qRT-PCR TaqMan         | f-GTCCCCAACACCCTCACCAAGATTGATTTAT-t** |
| <i>SIEF1</i> $\alpha$ -qRT-PCR F      | CCAAGAGGCCATCAGACAAA                  |
| <i>SIEF1</i> $\alpha$ -qRT-PCR R      | AGGCTTGATCACACCAGTCTCA                |
| <i>SIEF1</i> $\alpha$ -qRT-PCR TaqMan | f-GCCCTCCGTCTTCCACTTCAG-t**           |

\*F and R indicate forward and reverse primers, respectively.

\*\*f and t in TaqMan probe sequences indicate the fluorescence labels FAM and TAMRA, respectively.

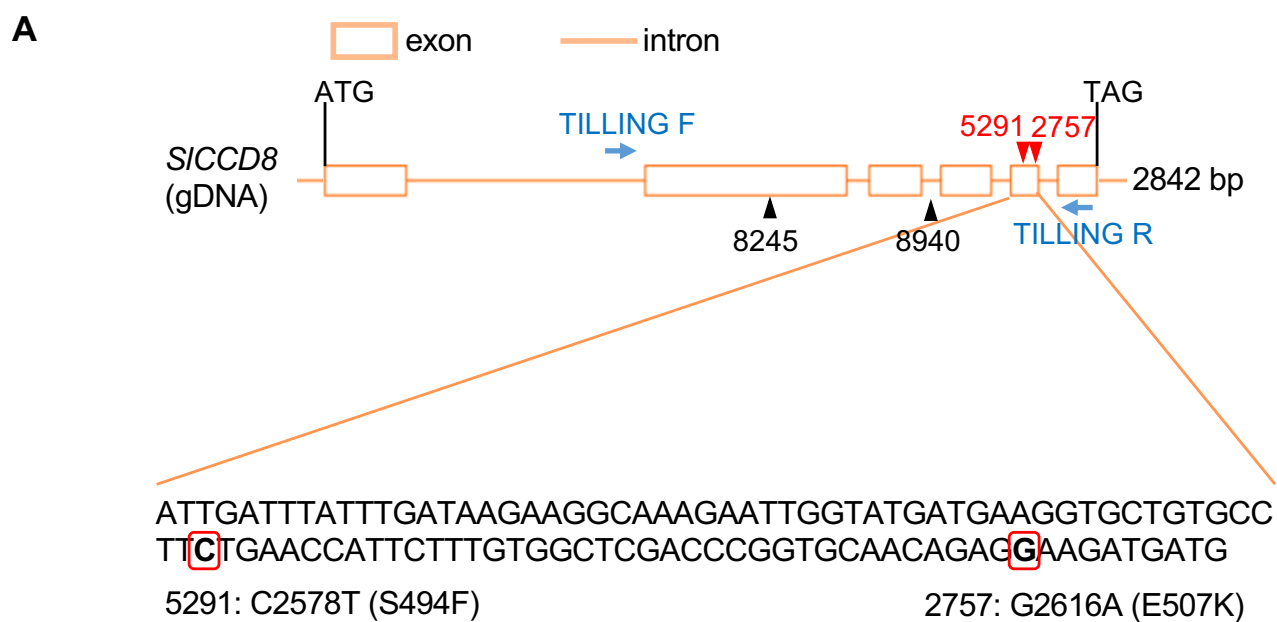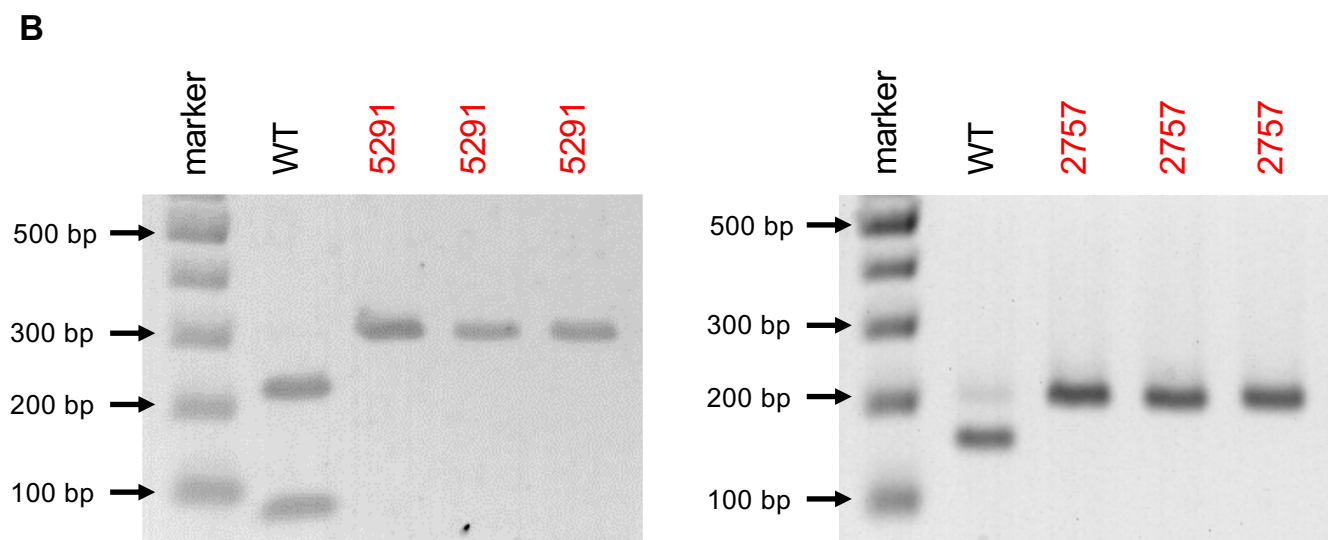

**Supplementary Fig. S1** Detection of lines 5291 and 2757. **A.** Structure of the *SlCCD8* gene. **B.** The *slccd8* mutants were found using the CAPS method. *Hpy*188I was used for 5291 and *Mbo*II for 2757. Red numbers indicate *slccd8* recessive homozygous mutants.



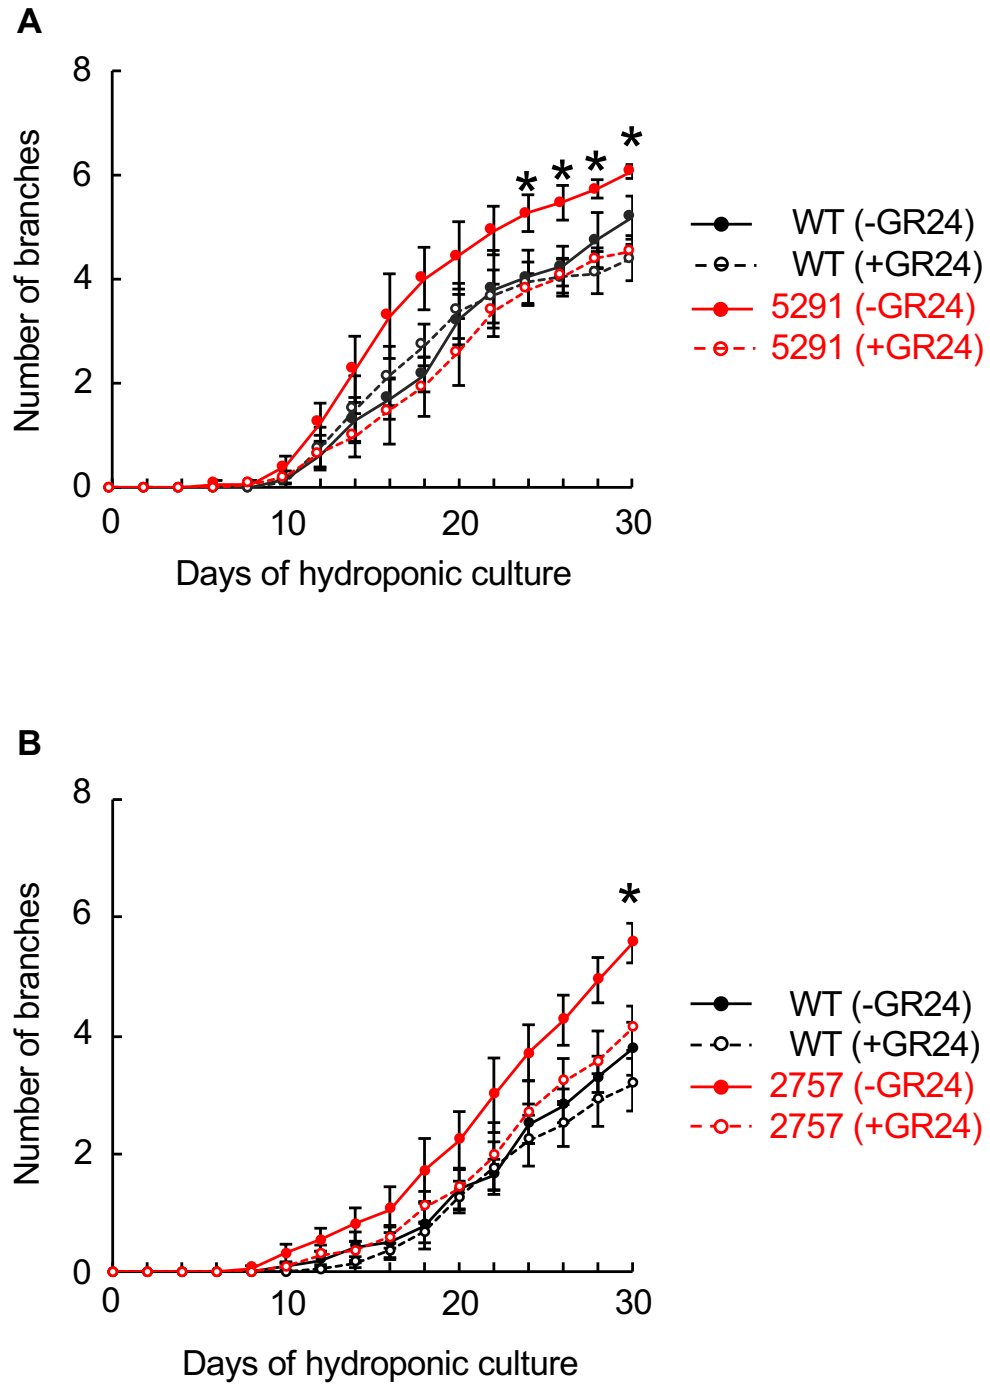

**Supplementary Fig. S3** Effect of exogenously applied SL (GR24) on branching. Branches were counted in 40-day-old plants. **A.** WT,  $n = 3$ ; line 5291,  $n = 3$ . **B.** WT,  $n = 4$ ; line 2757,  $n = 4$ . Error bars, S.E. Asterisks indicate significant differences between untreated and treated *slccd8* mutants (Student's *t*-test,  $*P < 0.05$ ).

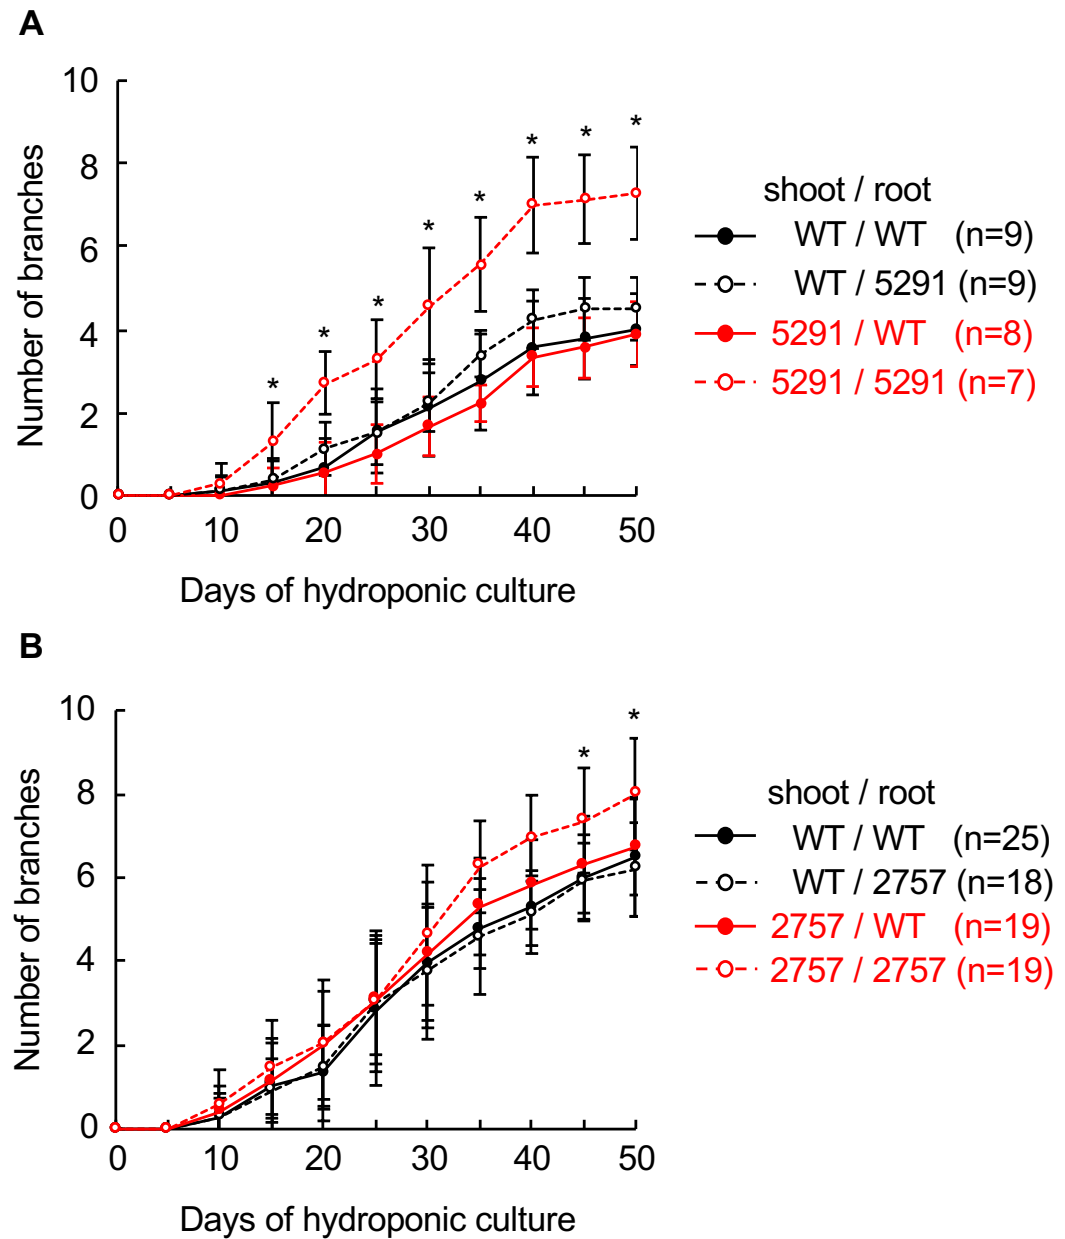

**Supplementary Fig. S4** Effect of endogenous SL on branching. Branches were counted for 50 days. **A.** Grafting of WT and line 5291. **B.** Grafting of WT and line 2757. Error bars, S.D. Asterisks indicate significant differences between 5291/5291 and 5291/WT in B and between 2757/2757 and 2757/WT in D (Student's *t*-test, \* $P < 0.05$ ).

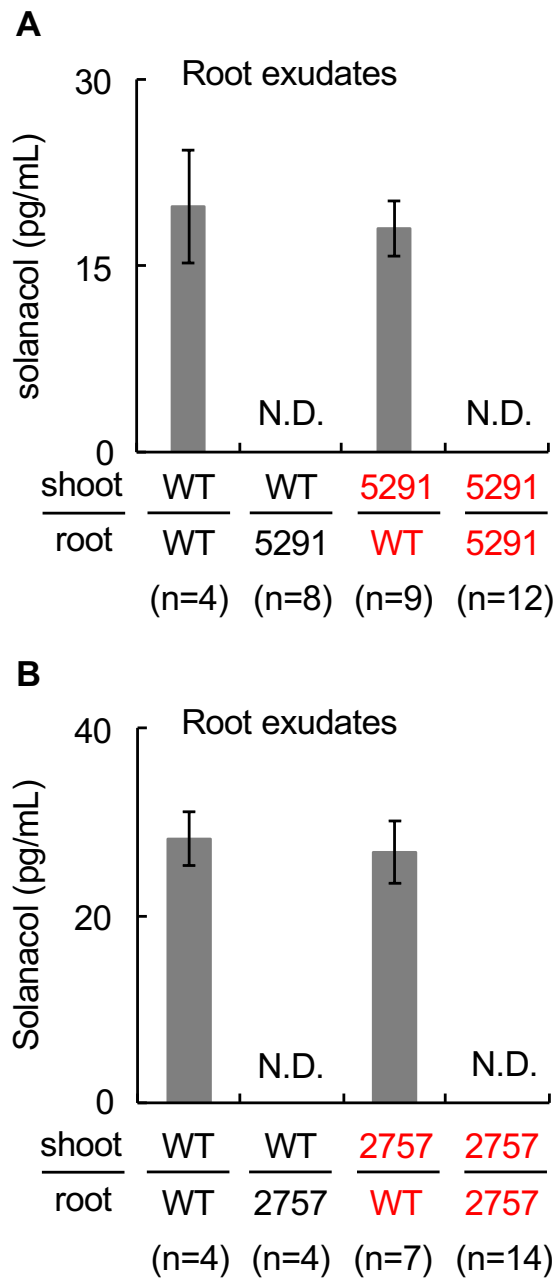

**Supplementary Fig. S5** Solanacol levels in root exudates in different grafting combinations between WT and *slccd8* mutants. **A** Grafting of WT and line 5291. **B**. Grafting of WT and line 2757. Error bars, S.E.; N.D., not detected.

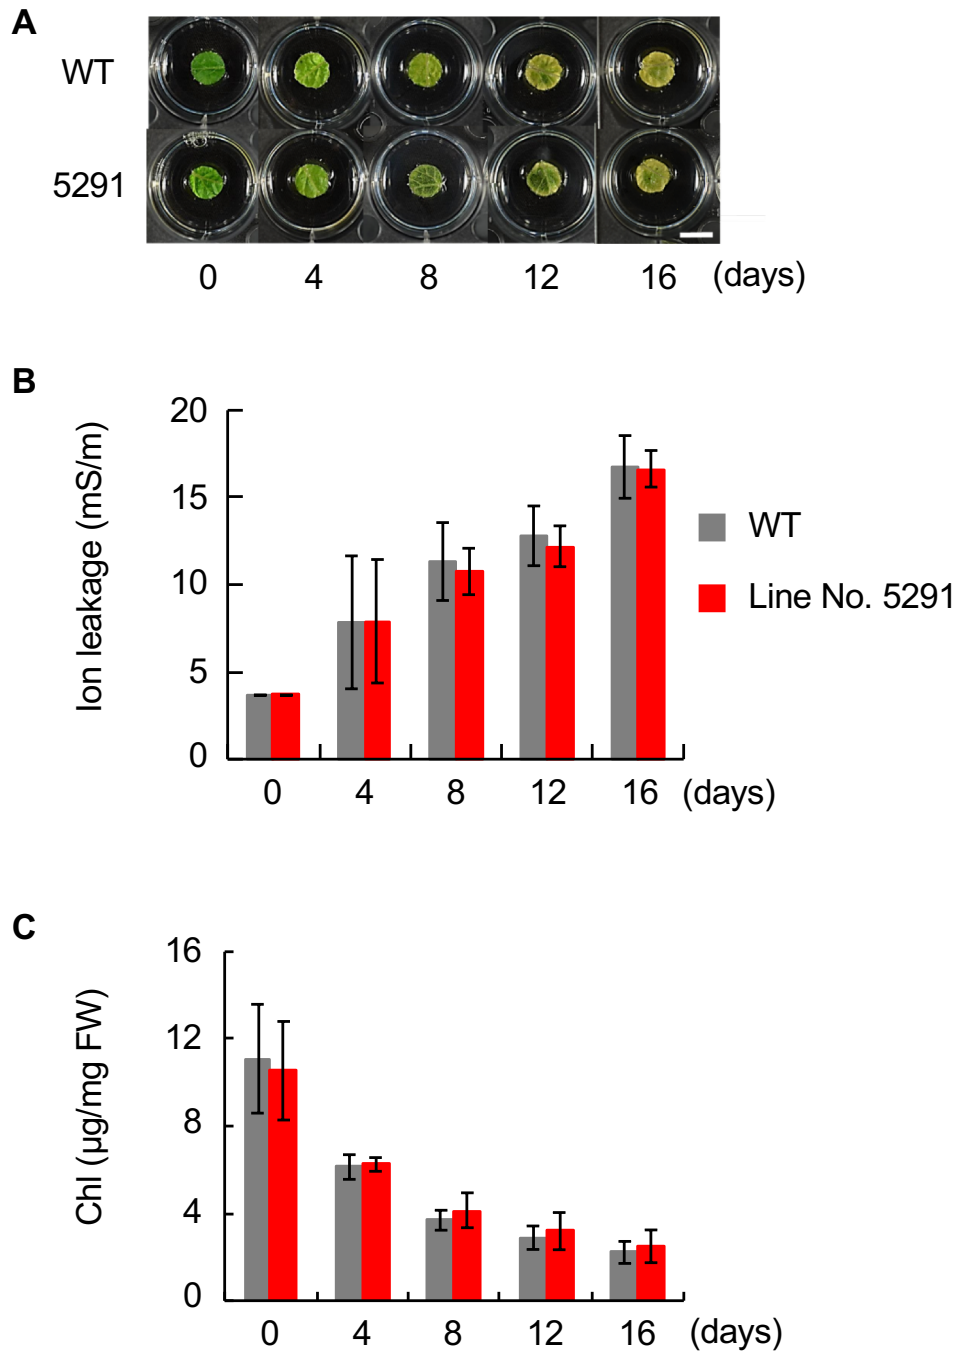

**Supplementary Fig. S6** Effect of exogenously applied SL on leaf senescence in WT and line 5291. **A.** Leaf discs. **B.** Ion leakage. **C.** Chlorophyll content. Error bars, S.E. ( $n = 3$ ). Student's  $t$ -test, No significant differences were found in Student's  $t$ -test ( $P \geq 0.05$ ).

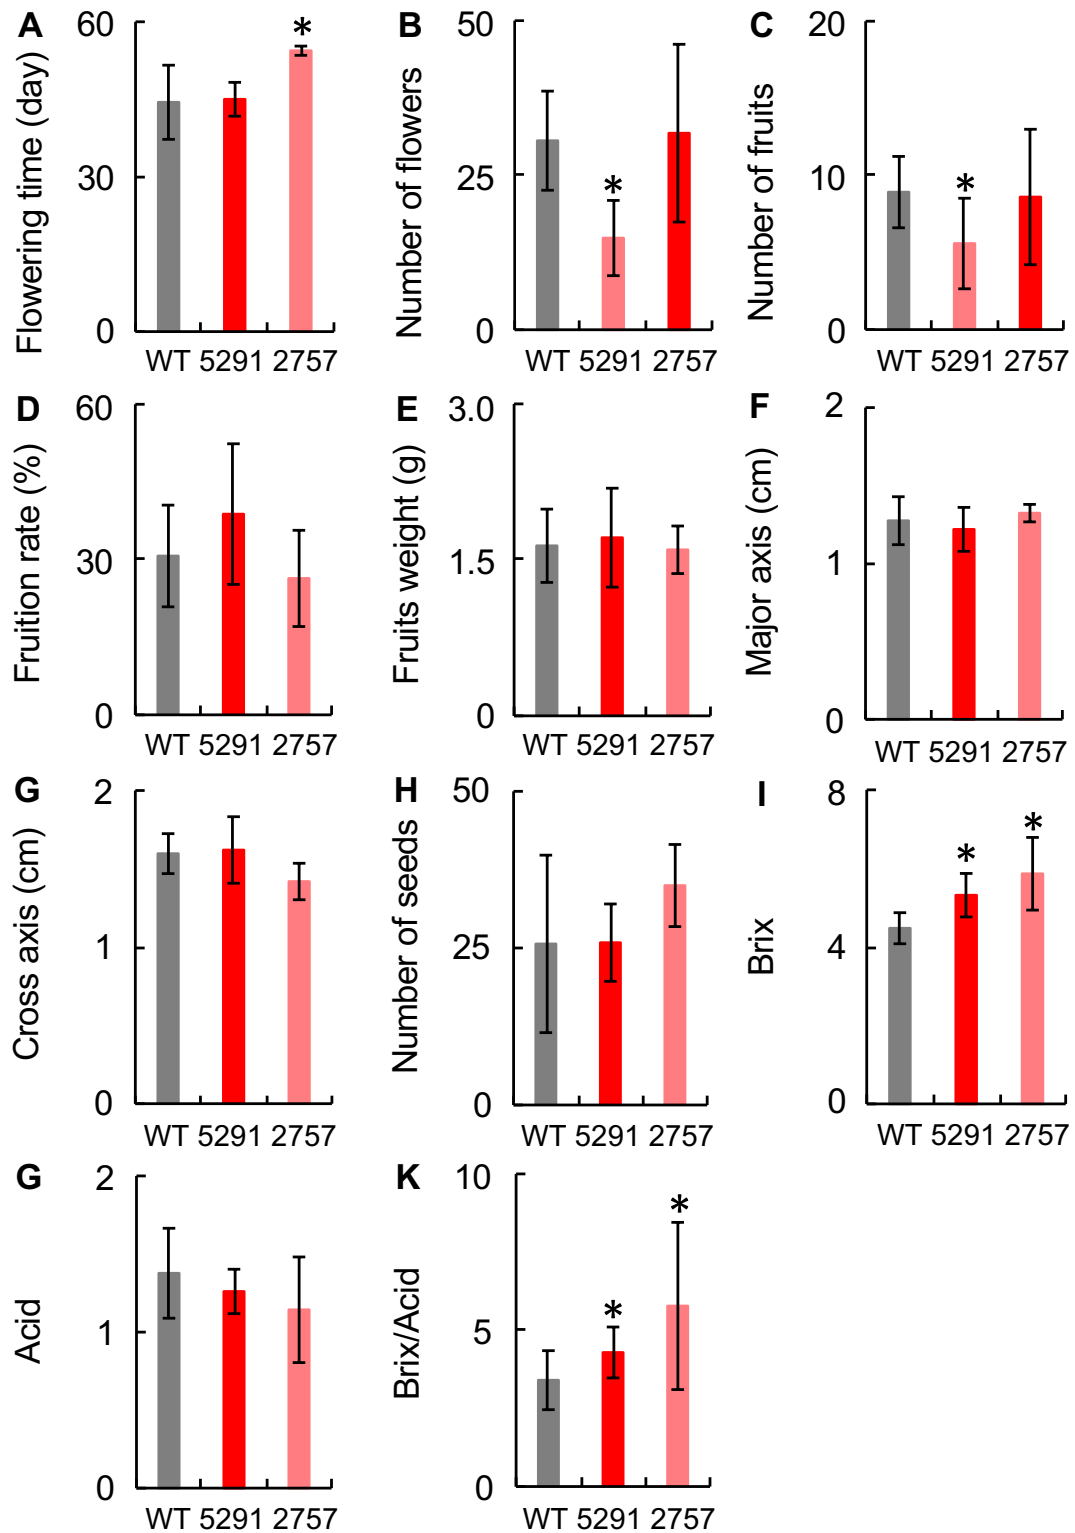

**Supplementary Fig. S7** Flower and fruit traits in *slccd8* mutants. Fruition rate is the number of fruits divided by the number of flowers. All fruit traits were assessed 70 days after flowering. WT and 5291,  $n = 12$ ; 2757,  $n = 5$ . Error bars, S.D. Student's  $t$ -test, \* $P < 0.05$ .

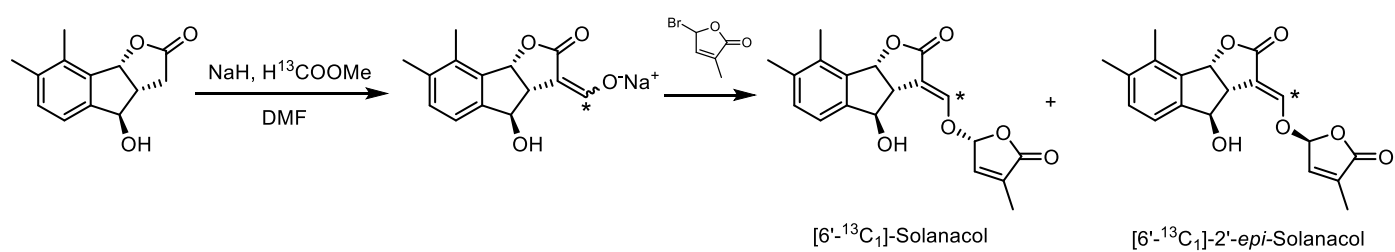

**Supplementary Fig. S8** Synthesis of  $[6'\text{-}^{13}\text{C}_1]$ -solanacol. Asterisks indicate the position of  $^{13}\text{C}$ .
